# Supplementary material
Source: HighWire-hosted journal article supplement (https://jitc.bmj.com/content/11/4/e006195)
Supplement: inline-supplementary-material-1 [file inline-supplementary-material-1.pdf]

## Supplemental Information

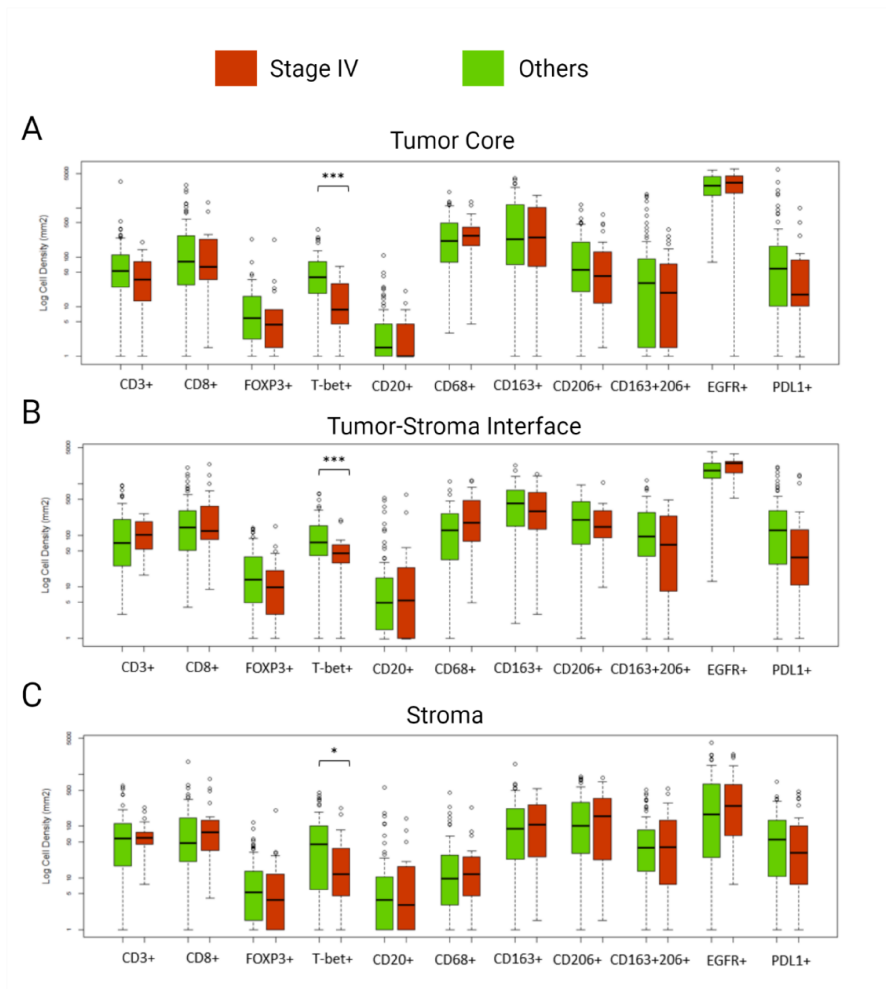

**Supplemental Figure 1:** Cell density (cells/mm<sup>2</sup>) of marked cell-types, stratified by clinical stage (Stage IV versus Stages I-III). Single asterisk denotes Wilcoxon  $p < 0.05$ , double-asterisk denotes  $p < 0.01$ , triple-asterisk denotes  $p < 0.001$ .

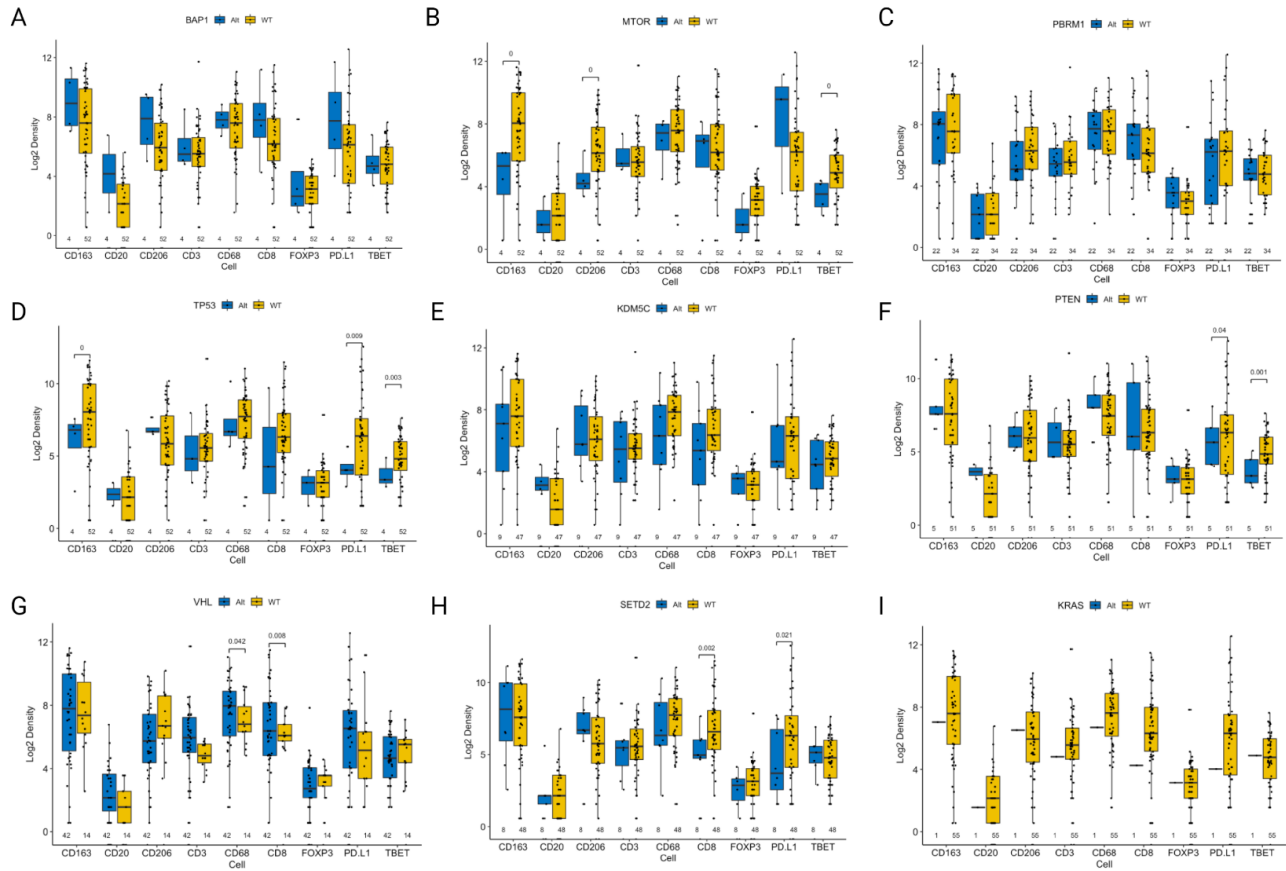

**Supplemental Figure 2:** Cell density (cells/mm<sup>2</sup>) of marked cell-types, stratified by somatic mutation status, Wilcoxon p-values listed within the figure. Somatic mutation stratification listed within each corresponding figure legend. A: BAP1. B: MTOR. C: PBRM1. D: TP53. E: KDM5C. F: PTEN. G: VHL. H: SETD2. I: KRAS.

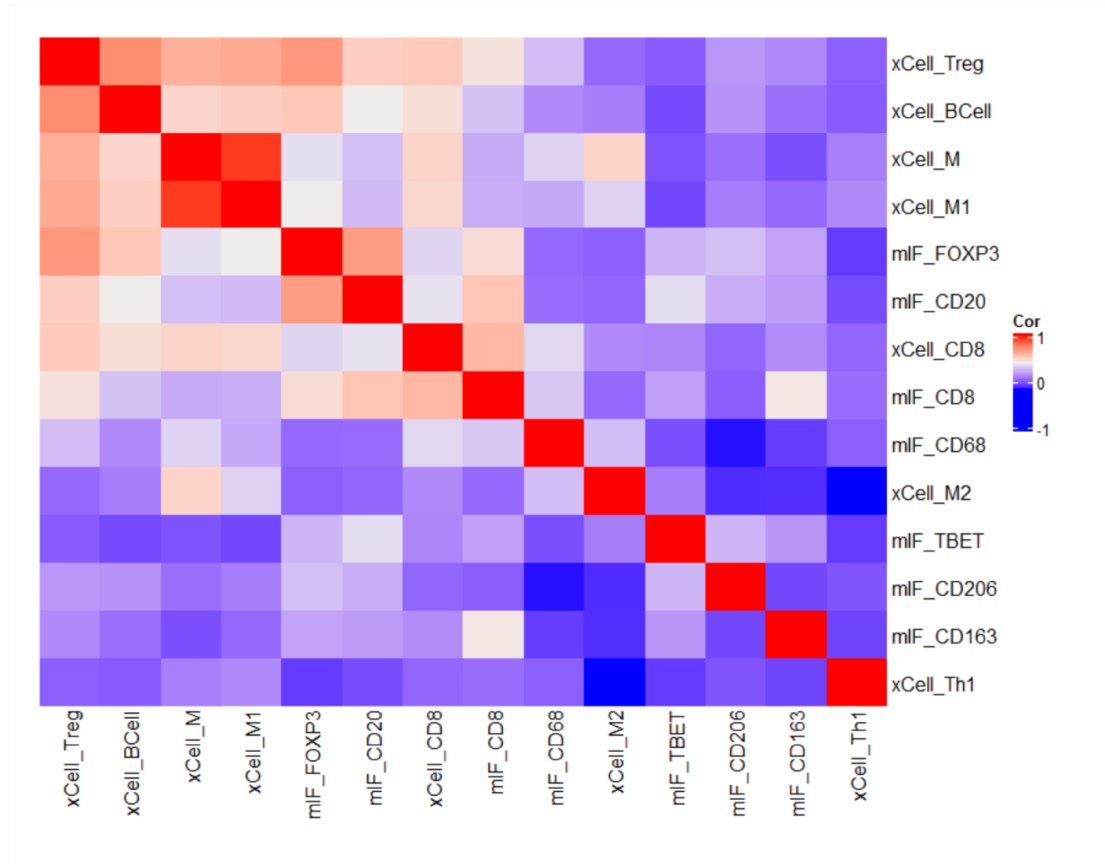

**Supplemental Figure 3:** Correlation matrix of xCell and mIF scores. Color scale indicates Spearman's correlation.

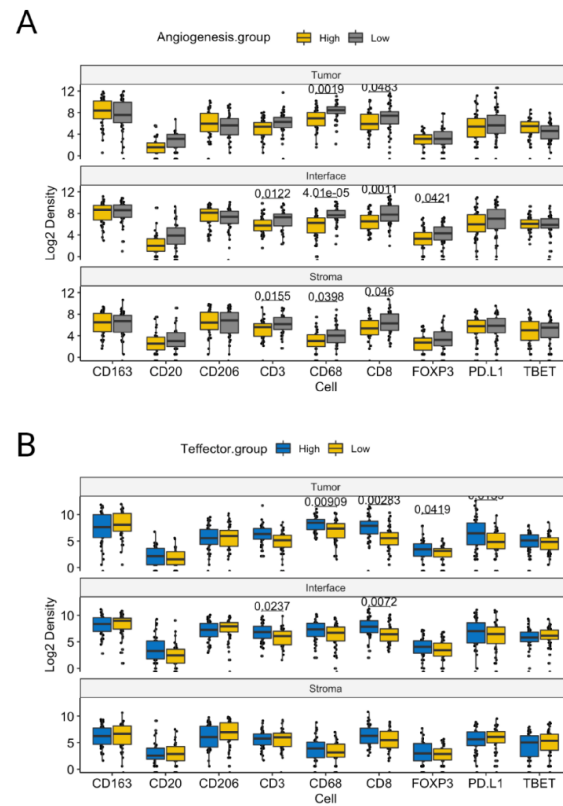

**Supplemental Figure 4:** Cell density (cells/mm<sup>2</sup>) of marked cell-types, stratified by Angiogenesis and T-effector gene signatures from the IMmotion150 clinical trial. Wilcoxon p-values reported within the figure.

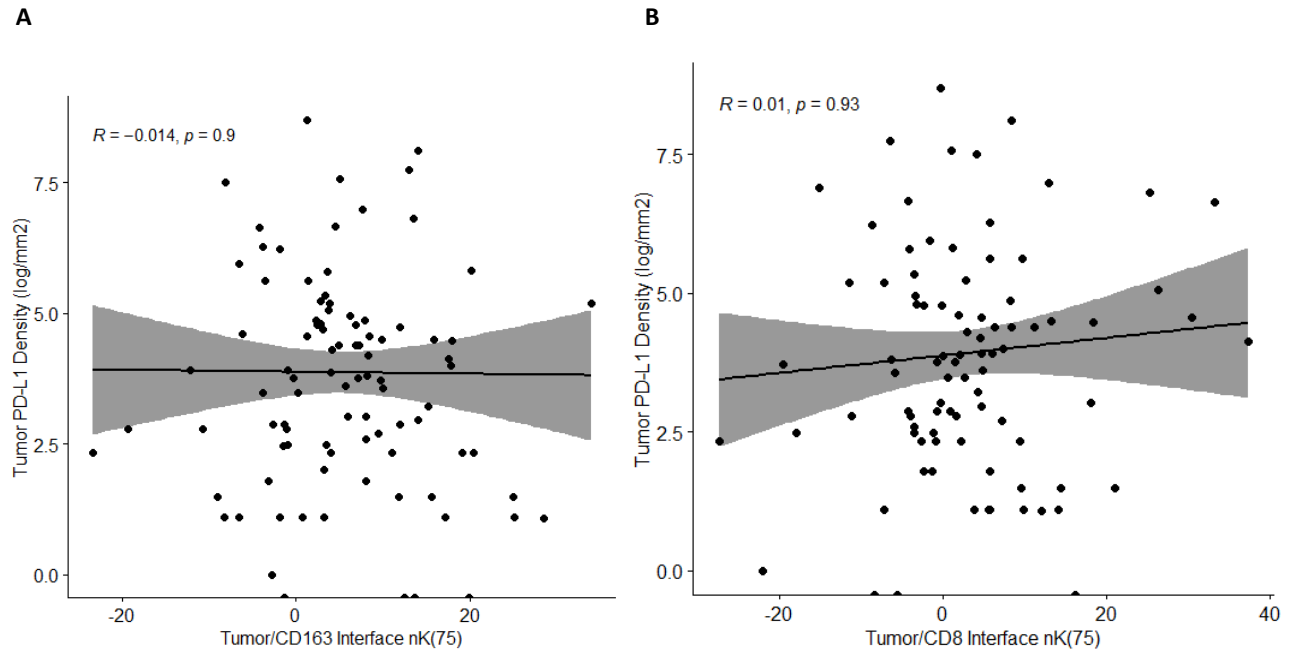

**Supplemental Figure 5:** A: Spearman's correlation between tumor-core PD-L1 density and Tumor/CD163 interface nK(75). B: Spearman's correlation between tumor-core PD-L1 density and Tumor/CD8 interface nK(75).

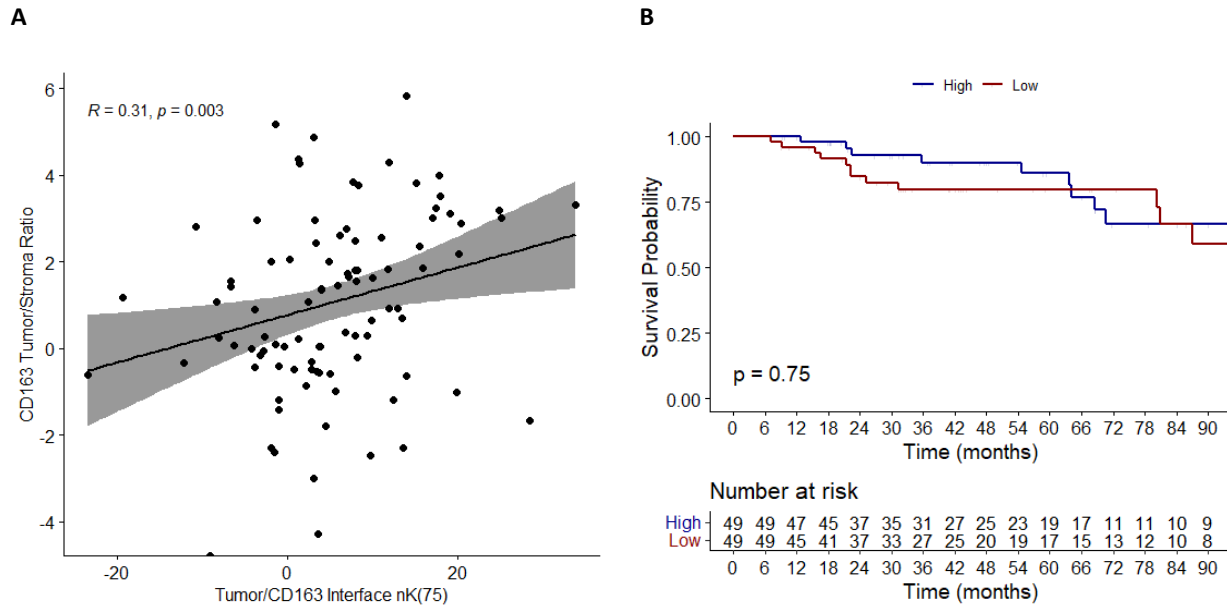

**Supplemental Figure 6:** A: Spearman's correlation between a ratio of tumor-core/stromal CD163 density, and tumor/CD163 interface nK(75). B: KM analysis for OS stratified by tumor-core/stromal CD163 density ratio median cut-points. Log-rank p-value shown within the plot.

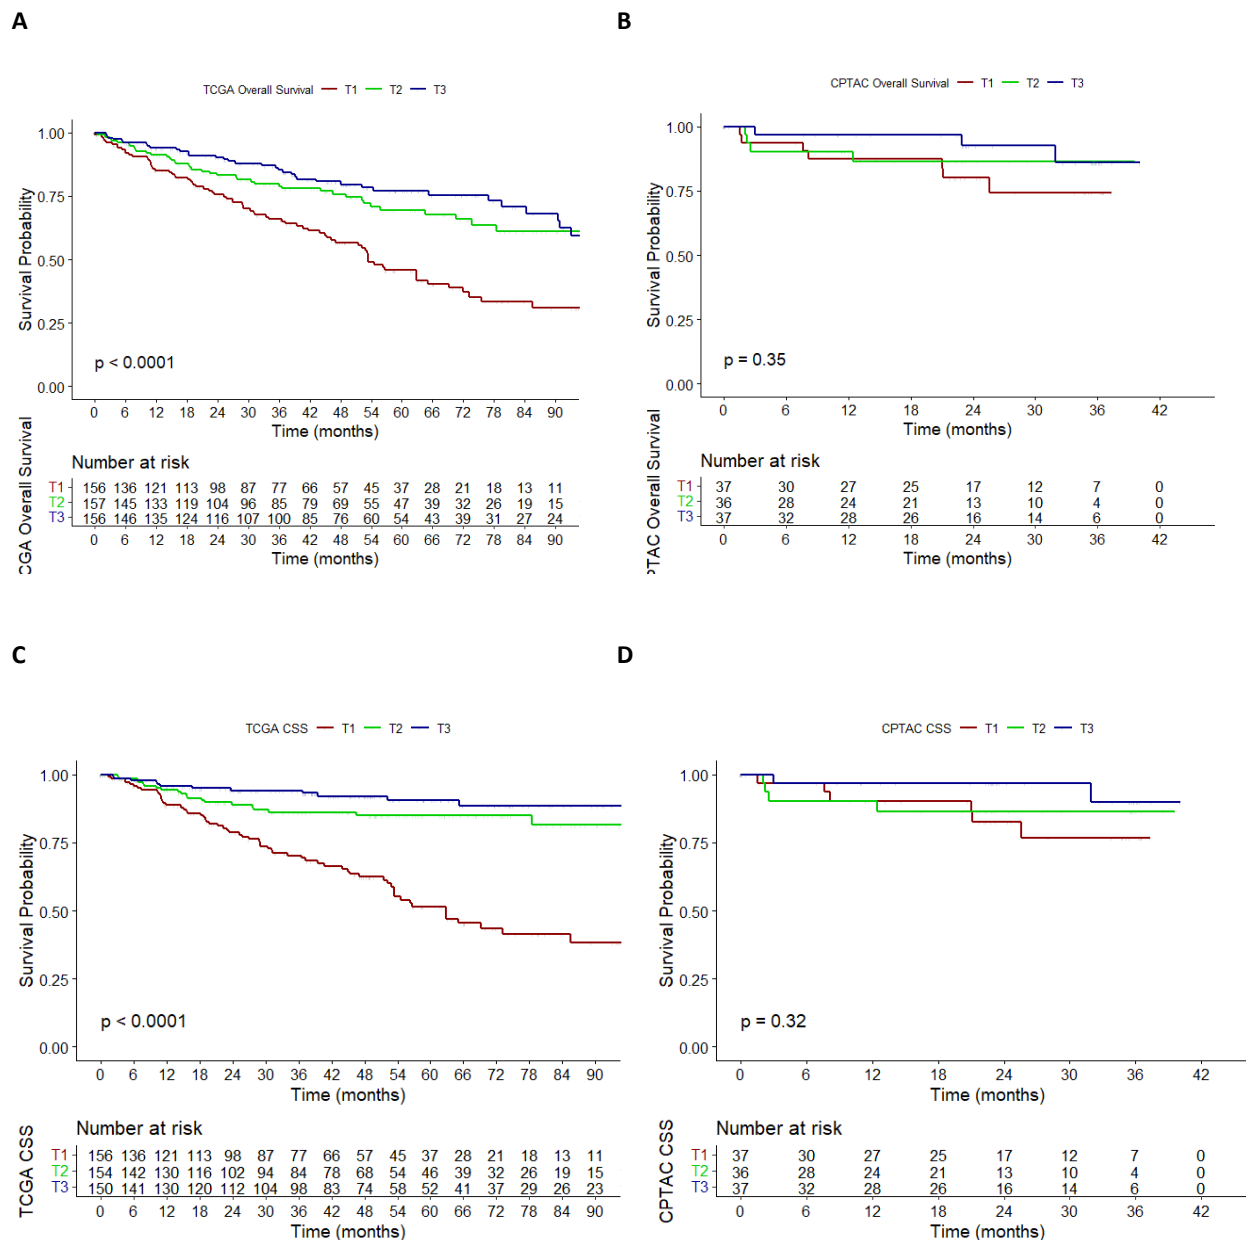

**Supplemental Figure 7:** A: TCGA cohort - KM analysis for OS, stratified by tertiles of the CD163 Clustering Gene Signature. B: CPTAC cohort - KM analysis for OS, stratified by tertiles of the CD163 Clustering Gene Signature. C: TCGA cohort - KM analysis for CSS, stratified by tertiles of the CD163 Clustering Gene Signature. D: CPTAC cohort - KM analysis for CSS, stratified by tertiles of the CD163 Clustering Gene Signature.

**A**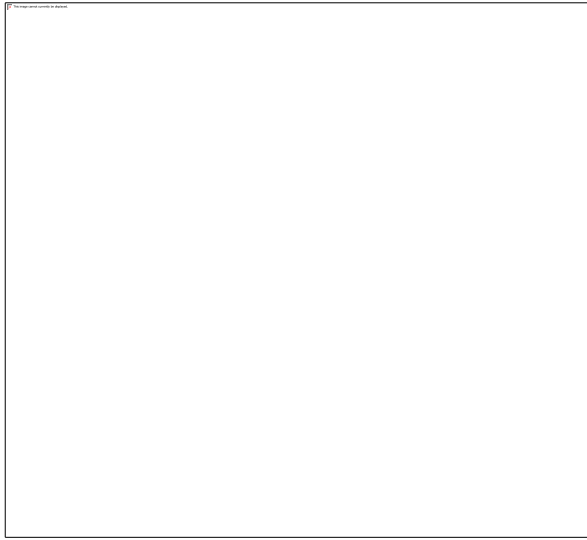**B**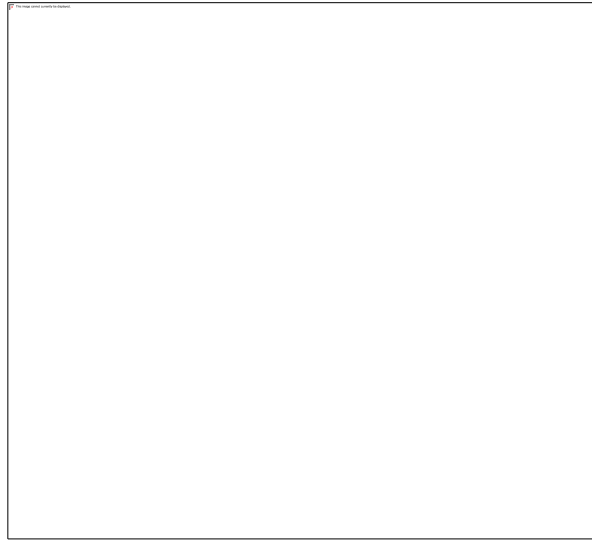

**Supplemental Figure 8:** Ridgeline density distribution plots demonstrating cell counts per ROI for each marked cell type. Square root normalized cell counts on the x-axis. Solid vertical line indicates a cutoff of 10 cells ( $\text{sqrt}=3.16$ ), which was utilized in this analysis as criteria for inclusion in geospatial analysis.



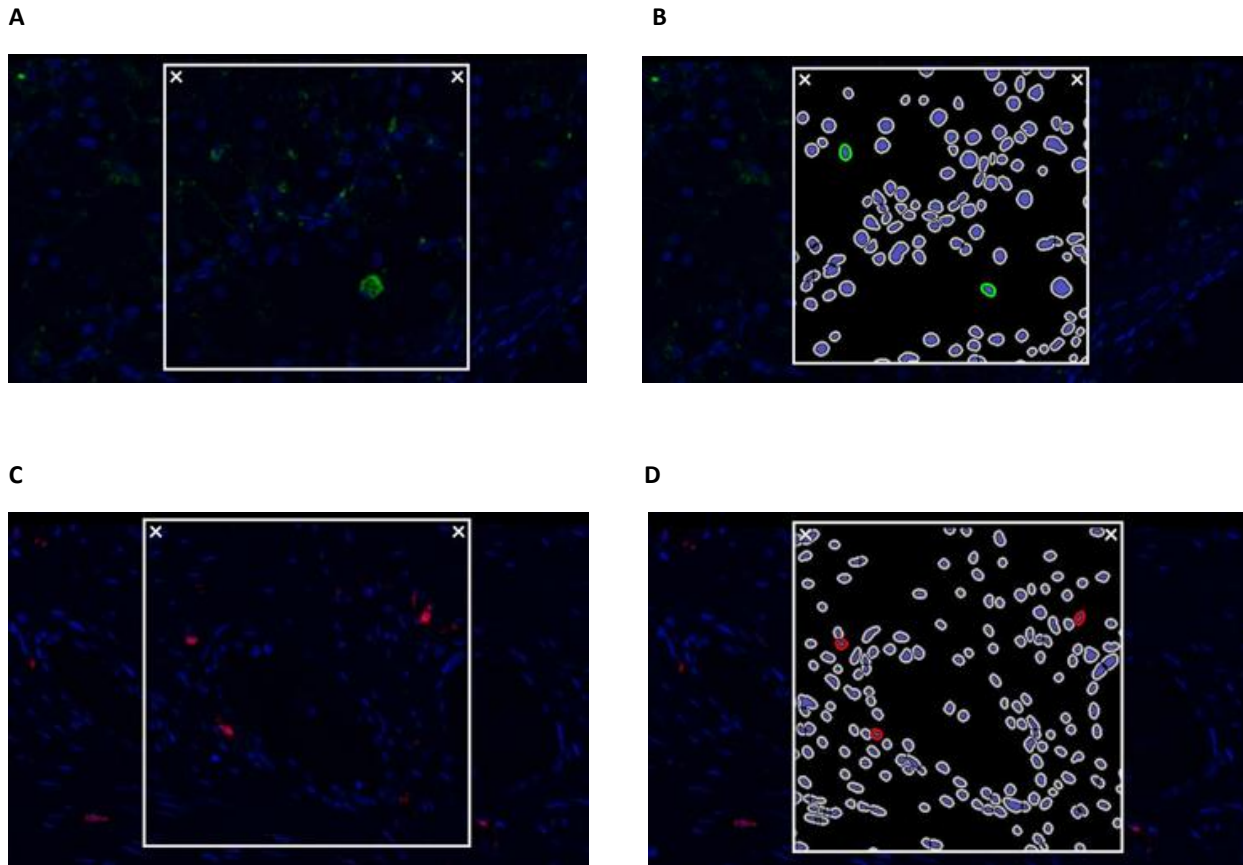

**Supplemental Figure 9:** Examples of HALO images pre- and post-markup utilizing the classification algorithm after setting nucleus and cytoplasm thresholds. Representative images were selected from regions where staining artifact occurs beyond the cellular boundary to demonstrate classification thresholds. A and B: Corresponding pre- and post-markup imaging stained for DAPI (blue) and CD68+ (green). C and D: Corresponding pre- and post-markup imaging stained for DAPI (blue) and CD163+ (red).

A

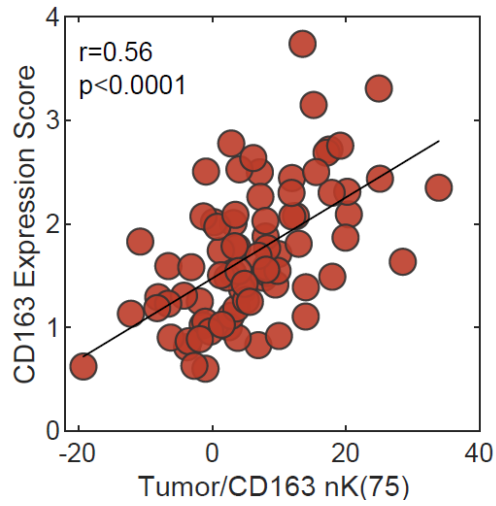

B

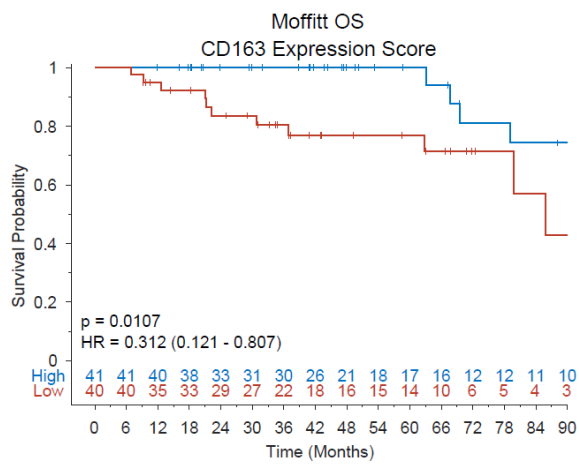

C

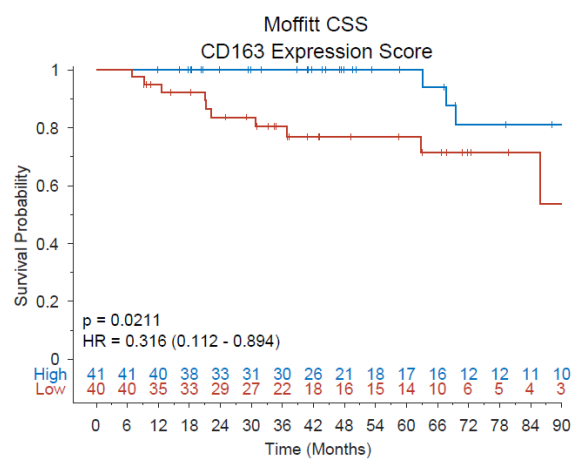

**Supplemental Figure 10.** A: scatter plot and Spearman's correlation between Tumor/CD163 nK(75) and CD163 gene expression score metrics within the Moffitt cohort. B: KM estimates of OS using the CD163 expression score within the Moffitt cohort. C: KM estimates of CSS using the CD163 expression score within the Moffitt cohort.

| Characteristic                                         | N = 97 <sup>1</sup> |
|--------------------------------------------------------|---------------------|
| <b>Age</b>                                             | 66 (59, 72)         |
| <b>Gender</b>                                          |                     |
| Male                                                   | 65 (67.0%)          |
| Female                                                 | 32 (33.0%)          |
| <b>Race</b>                                            |                     |
| White                                                  | 85 (87.6%)          |
| Black                                                  | 4 (4.1%)            |
| Other                                                  | 8 (8.3%)            |
| <b>Histology</b>                                       |                     |
| ccRCC                                                  | 97 (100%)           |
| <b>Tumor Size (cm)</b>                                 | 6.2 (4.5, 9.5)      |
| <b>SSIGN</b>                                           | 7.0 (3.0, 7.8)      |
| <b>Clinical Stage</b>                                  |                     |
| Stage I/II                                             | 24 (24.7%)          |
| Stage III                                              | 49 (50.5%)          |
| Stage IV                                               | 24 (24.7%)          |
| <sup>1</sup> Statistics presented: median (IQR); n (%) |                     |

**Supplemental Table 1.** Baseline patient and tumor demographics

**Overall Survival**

| Metric                            | Median   | N Low | N High | Surv. Hi (mos.) | Surv. Lo (mos.) | Log-Rank P | FDR-adjusted Cox P |
|-----------------------------------|----------|-------|--------|-----------------|-----------------|------------|--------------------|
| InterfaceROI.Tumor.CD163.K.75     | 4.656111 | 46    | 46     | 148.9956        | 85.84016        | 0          | 0                  |
| InterfaceROI.Tumor.CD8.K.75       | 2.02284  | 43    | 44     | 148.9956        | 67.59378        | 0.002      | 0                  |
| InterfaceROI.CD68.Density         | 143.1823 | 48    | 49     | 138.5409        | 148.99563       | 0.013      | 0.1                |
| InterfaceROI.Tumor.CD163.206.K.75 | 4.009733 | 38    | 39     | 148.9956        | 138.54095       | 0.014      | 0.292              |
| InterfaceROI.Stroma.CD163.K.Area  | -381.158 | 46    | 46     | 114.2124        | 148.99563       | 0.03       | 0.356              |

**ccRCC Specific Survival**

| Metric                            | Median   | N Low | N High | Surv. Hi (mos.) | Surv. Lo (mos.) | Log-Rank P | FDR-adjusted Cox P |
|-----------------------------------|----------|-------|--------|-----------------|-----------------|------------|--------------------|
| InterfaceROI.Tumor.CD8.K.75       | 2.02284  | 43    | 44     | 173.7811        | 69.08818        | 0          | 0                  |
| InterfaceROI.Tumor.CD163.K.75     | 4.656111 | 46    | 46     | 173.7811        | 85.20984        | 0          | 0                  |
| InterfaceROI.Tumor.CD163.206.K.75 | 4.009733 | 38    | 39     | 173.7811        | 137.52366       | 0.004      | 0.084              |
| InterfaceROI.Tumor.CD68.K.75      | 8.134679 | 42    | 42     | 173.7811        | 137.52366       | 0.007      | 0.116              |
| InterfaceROI.CD68.K.75            | 19.71405 | 42    | 42     | 173.7811        | 113.3738        | 0.011      | 0.23               |
| InterfaceROI.CD68.Density         | 143.1823 | 48    | 49     | 137.5237        | 173.78108       | 0.016      | 0.079              |
| InterfaceROI.Stroma.CD163.K.75    | -3.34679 | 46    | 46     | 113.3738        | 173.78108       | 0.025      | 0.22               |
| InterfaceROI.Tumor.CD3.K.75       | -2.97018 | 42    | 42     | 173.7811        | 113.3738        | 0.046      | 0.076              |

**Recurrence Free Survival**

| Metric                       | Median   | N Low | N High | Surv. Hi (mos.) | Surv. Lo (mos.) | Log-Rank P | FDR-adjusted Cox P |
|------------------------------|----------|-------|--------|-----------------|-----------------|------------|--------------------|
| InterfaceROI.Tumor.CD20.K.75 | -8.29682 | 8     | 8      | 79.65633        | 15.73717        | 0.001      | 0.269              |
| StromaROI.CD3.Density        | 57.01469 | 36    | 36     | 49.95206        | 79.65633        | 0.001      | 0.409              |
| TumorROI.Stroma.CD8.K.75     | -1.09861 | 25    | 26     | 60.02464        | 147.65754       | 0.018      | 0.269              |
| StromaROI.Stroma.CD3.K.75    | -0.10601 | 25    | 26     | 49.83984        | 147.65754       | 0.019      | 0.409              |
| InterfaceROI.FOXP3.K.75      | 12.57078 | 13    | 13     | 57.62628        | NA              | 0.025      | 0.41               |

**Supplemental Table 2.** Overall survival, ccRCC specific survival, and recurrence-free survival tables for the metrics that demonstrated the highest associations within each outcome measurement.

| mIF Stain | Cell Type                            | Panel 1 | Panel 2 | Panel 3 |
|-----------|--------------------------------------|---------|---------|---------|
| DAPI      | Nucleus                              | +       | +       | +       |
| PCK       | Tumor cell                           | +       | +       | +       |
| CD3       | T-cell                               | +       | -       | -       |
| CD8       | Cytotoxic T-cell                     | +       | -       | +       |
| FOXP3     | FOXP3+ Treg cell                     | +       | -       | -       |
| T-bet     | T-bet+ Th cell                       | +       | -       | -       |
| CD20      | B-cell                               | -       | +       | -       |
| PD-L1     | PD-L1+ cell                          | -       | +       | +       |
| CD68      | Macrophage                           | -       | +       | -       |
| CD163     | CD163+ M2 Macrophage                 | -       | +       | +       |
| CD206     | CD206+ M2 Macrophage                 | -       | +       | -       |
| TIM-3     | T-cell Terminal Exhaustion (w/ CD8+) | -       | -       | +       |

**Supplemental Table 3.** Summary table of the mIF stains utilized in this analysis, with their generalized corresponding cell-types, as well as their presence in each of the 3 mIF panels utilized in this analysis.

| Gene Symbol | GeneID    | Map_location | Description                                           | R         | Cancer-Specific Context                                                                                                                                                    |
|-------------|-----------|--------------|-------------------------------------------------------|-----------|----------------------------------------------------------------------------------------------------------------------------------------------------------------------------|
| GABRB1      | 2560      | 4p12         | gamma-aminobutyric acid type A receptor subunit beta1 | 0.354779  | Weakly associated with colon adenocarcinoma as compared with normal tissue (PMID: 32565954)                                                                                |
| NEBL        | 10529     | 10p12.31     | nebullette                                            | 0.33575   | Inhibited pancreatic cancer cell progression through TGF-B suppression (PMID: 30945341)                                                                                    |
| C17orf107   | 100130311 | 17p13.2      | chromosome 17 open reading frame 107                  | 0.33374   | Minimal prior characterization                                                                                                                                             |
| TMEM125     | 128218    | 1p34.2       | transmembrane protein 125                             | 0.331452  | Associated with improved prognosis in papillary RCC (PMID: 33154194)                                                                                                       |
| CCDC85C     | 317762    | 14q32.2      | coiled-coil domain containing 85C                     | 0.32089   | A mutation of CCDC85C has been utilized as a potent tumor-rejection neo-epitope in in-vitro studies (PMID: 31219806)                                                       |
| PTPN13      | 5783      | 4q21.3       | protein tyrosine phosphatase non-receptor type 13     | 0.319264  | Well described tyrosine phosphatase associated with suppression of tumor growth in multiple primary sites, breast cancer in particular (PMID: 21235435)                    |
| TUFT1       | 7286      | 1q21.3       | tuftelin 1                                            | 0.318564  | Overexpression has been associated with cell proliferation and EMT progression in RCC (PMID: 34257606)                                                                     |
| HOXC9       | 3225      | 12q13.13     | homeobox C9                                           | 0.317886  | Well described homeobox transcription factor that has been consistently shown to regulate tumor angiogenesis (PMID: 32456563)                                              |
| LTF         | 4057      | 3p21.31      | lactotransferrin                                      | -0.317886 | Suppresses AKT signalling, decreases cellular migration in ccRCC (PMID 32244557)                                                                                           |
| CORO2A      | 7464      | 9q22.33      | coronin 2A                                            | -0.318293 | Promotes migration and proliferation of breast cancer cells (PMID 32695665)                                                                                                |
| SCN3A       | 6328      | 2q24.3       | sodium voltage-gated channel alpha subunit 3          | -0.322846 | Minimal prior characterization                                                                                                                                             |
| VTN         | 7448      | 17q11.2      | vitronectin                                           | -0.325326 | Cell-adhesion basement membrane glycoprotein, found to be an oncogenic mediator in gastric cancer, regulated by VEGFR2 (PMID 30819137)                                     |
| CNTN5       | 53942     | 11q22.1      | contactin 5                                           | -0.327104 | Minimal prior characterization                                                                                                                                             |
| IFNGR1      | 3459      | 6q23.3       | interferon gamma receptor 1                           | -0.335388 | Receptor for IFN-G, which is a major cytokine regulating macrophage polarization and angiogenesis. Both pro- and anti-tumor effects have been identified. (PMID 27667683). |
| CHI3L2      | 1117      | 1p13.2       | chitinase 3 like                                      | -0.343428 | In breast cancer, overexpression has                                                                                                                                       |

|         |        |          |                                        |           |                                                                                                                                                                                                                |
|---------|--------|----------|----------------------------------------|-----------|----------------------------------------------------------------------------------------------------------------------------------------------------------------------------------------------------------------|
|         |        |          | 2                                      |           | been associated with infiltrating M1 and M2 macrophages, TGF-B, T-cell exhaustion (PMID 33937022).                                                                                                             |
| BMP7    | 655    | 20q13.31 | bone morphogenetic protein 7           | -0.345505 | Well described molecule in TGF-B superfamily, found to be associated with immunotherapy resistance in RCC via BMP7 secretion by tumor cells and acting on macrophages in the microenvironment (PMID 32973129). |
| TTPAL   | 79183  | 20q13.12 | alpha tocopherol transfer protein like | -0.362669 | Overexpressed in colon adenocarcinoma, promotes tumorigenesis by activating WNT/B-catenin signalling (PMID 31018940). Overexpressed in gastric cancer, found to activate P13K/AKT signaling (PMID 34642500).   |
| KRT32   | 3882   | 17q21.2  | keratin 32                             | -0.362933 | Minimal prior characterization                                                                                                                                                                                 |
| ADPRHL1 | 113622 | 13q34    | ADP-ribosylhydrolase like 1            | -0.36409  | Minimal prior characterization                                                                                                                                                                                 |
| SP5     | 389058 | 2q31.1   | Sp5 transcription factor               | -0.394021 | Diminishes expression of genes previously activated by the WNT pathway, particularly in stem cells (PMID: 29044119)                                                                                            |

**Supplemental Table 4.** Summary table of the 20 genes included in the CD163 Clustering Gene Signature that was applied to the TCGA and CPTAC cohorts.

**Median OS**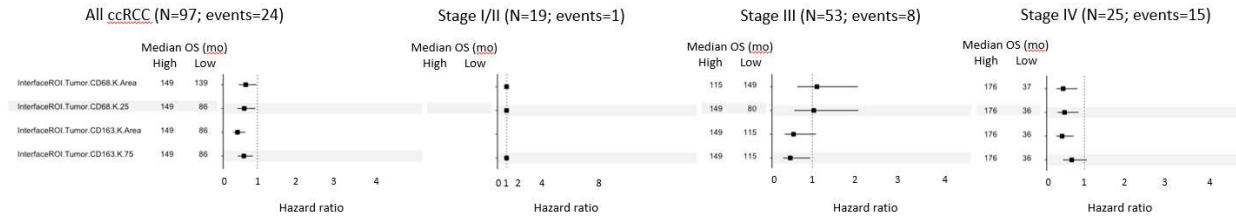

**Supplemental Table 5.** Overall survival outcomes, Cox proportional hazards regression, for the primary outcomes of interest (CD68 and CD163 bivariate tumor clustering at the interface), stratified by clinical stage.
